# Supplementary figures and images for: Post-Emergence Herbicides for Effective Weed Management, Enhanced Wheat Productivity, Profitability and Quality in North-Western Himalayas: A ‘Participatory-Mode’ Technology Development and Dissemination
Source: MDPI journal article supplement (doi:10.3390/su13105425), 2021-05-12

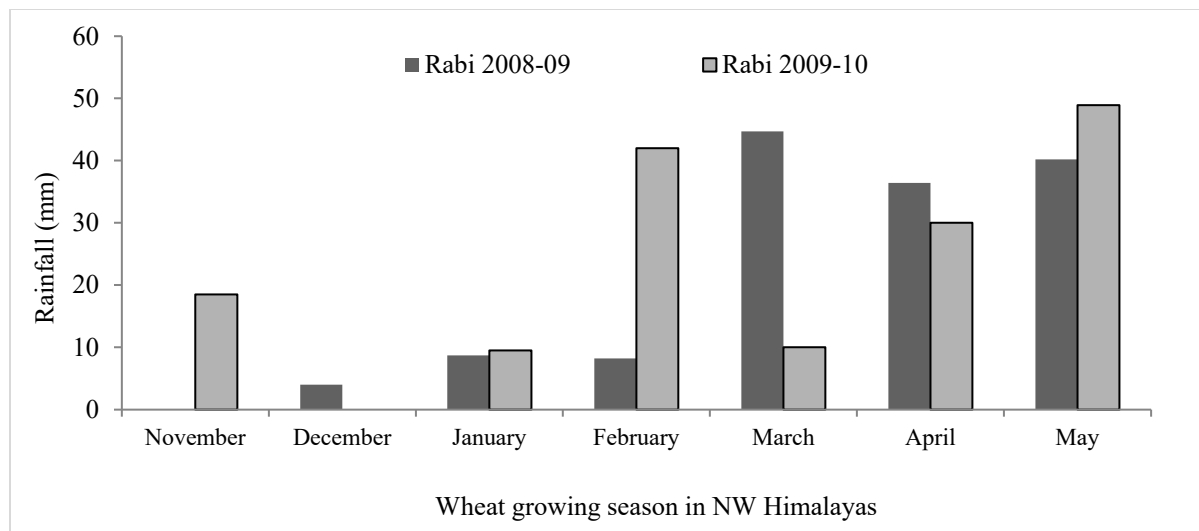

**Figure S1.** Rainfall pattern of the study area during crop growth months (*Rabi* 2008-2009 to 2009-2010).

Supplement: s1 [file s1]
